# Supplementary material for: Prediction of the main macrocyclic conjugation pathway for porphyrinoids from the ring current distribution
Source: Royal Society of Chemistry journal article supplement (doi:10.1039/b910521b), 2009-10-15
Supplement: b910521b.pdf [file b910521b.pdf]

## Electronic Supplementary Information

### Prediction of the Main Macrocyclic Conjugation Pathway of Porphyrinoids from the Ring Current Distribution

Jun-ichi Aihara and Masakazu Makino

B3LYL/6-31G\*\*-optimized geometries of orangarin (**7**), sapphyrin (**8**), and amethyryn (**9**) are presented numerically in Table S1 and graphically in Figure S1. These geometries were used to evaluate ring and circuit currents induced in the  $\pi$ -systems.

**Table S1** B3LYL/6-31G\*\*-optimized geometries of orangarin (**7**), sapphyrin (**8**), and amethyryn (**9**).

#### A. Orangarin (**7**)

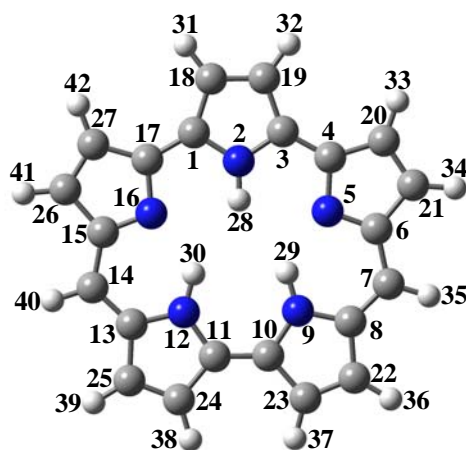

| Position<br>Number | Atomic<br>Number | Cartesian Coordinates / Å |           |           |
|--------------------|------------------|---------------------------|-----------|-----------|
|                    |                  | X                         | Y         | Z         |
| 1                  | 6                | -1.142780                 | 2.859596  | -0.016244 |
| 2                  | 7                | -0.000001                 | 2.111309  | -0.053510 |
| 3                  | 6                | 1.142777                  | 2.859597  | -0.016236 |
| 4                  | 6                | 2.351597                  | 2.177004  | -0.010895 |
| 5                  | 7                | 2.267391                  | 0.786808  | -0.026769 |
| 6                  | 6                | 3.518117                  | 0.317059  | -0.007994 |
| 7                  | 6                | 3.806333                  | -1.093410 | -0.003533 |
| 8                  | 6                | 2.813025                  | -2.054421 | -0.000864 |
| 9                  | 7                | 1.466336                  | -1.761294 | -0.003407 |
| 10                 | 6                | 0.689396                  | -2.910440 | 0.005439  |
| 11                 | 6                | -0.689393                 | -2.910441 | 0.005439  |
| 12                 | 7                | -1.466335                 | -1.761295 | -0.003410 |
| 13                 | 6                | -2.813022                 | -2.054424 | -0.000859 |
| 14                 | 6                | -3.806332                 | -1.093412 | -0.003526 |
| 15                 | 6                | -3.518117                 | 0.317054  | -0.007998 |
| 16                 | 7                | -2.267390                 | 0.786805  | -0.026781 |
| 17                 | 6                | -2.351598                 | 2.177000  | -0.010907 |
| 18                 | 6                | -0.684918                 | 4.239294  | 0.030448  |
| 19                 | 6                | 0.684912                  | 4.239295  | 0.030454  |
| 20                 | 6                | 3.736142                  | 2.584654  | 0.015605  |
| 21                 | 6                | 4.471078                  | 1.430926  | 0.015621  |
| 22                 | 6                | 2.893127                  | -3.509975 | 0.007968  |
| 23                 | 6                | 1.626865                  | -4.014641 | 0.011835  |
| 24                 | 6                | -1.626860                 | -4.014642 | 0.011842  |
| 25                 | 6                | -2.893123                 | -3.509977 | 0.007982  |
| 26                 | 6                | -4.471079                 | 1.430921  | 0.015631  |
| 27                 | 6                | -3.736145                 | 2.584650  | 0.015584  |
| 28                 | 1                | 0.000000                  | 1.108452  | -0.094584 |
| 29                 | 1                | 1.202032                  | -0.776616 | -0.000817 |
| 30                 | 1                | -1.202032                 | -0.776617 | -0.000828 |
| 31                 | 1                | -1.331594                 | 5.104799  | 0.066697  |
| 32                 | 1                | 1.331586                  | 5.104801  | 0.066708  |
| 33                 | 1                | 4.105509                  | 3.601642  | 0.030204  |
| 34                 | 1                | 5.549568                  | 1.339025  | 0.032770  |
| 35                 | 1                | 4.840137                  | -1.417844 | 0.003856  |
| 36                 | 1                | 3.818527                  | -4.069247 | 0.010604  |
| 37                 | 1                | 1.342767                  | -5.057945 | 0.018142  |
| 38                 | 1                | -1.342762                 | -5.057946 | 0.018152  |
| 39                 | 1                | -3.818522                 | -4.069249 | 0.010627  |
| 40                 | 1                | -4.840136                 | -1.417846 | 0.003877  |
| 41                 | 1                | -5.549568                 | 1.339019  | 0.032796  |
| 42                 | 1                | -4.105513                 | 3.601638  | 0.030174  |

## B. Sapphyrin (8)

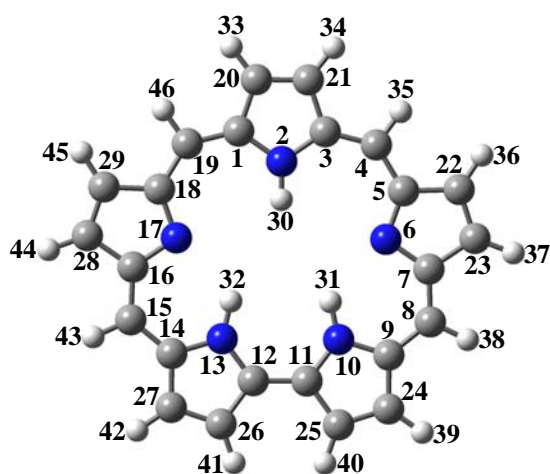

| Position Number | Atomic Number | Cartesian Coordinates / Å |           |           |
|-----------------|---------------|---------------------------|-----------|-----------|
|                 |               | X                         | Y         | Z         |
| 1               | 6             | -1.137116                 | 3.412159  | -0.000298 |
| 2               | 7             | 0.000001                  | 2.622175  | 0.000003  |
| 3               | 6             | 1.137119                  | 3.412158  | 0.000296  |
| 4               | 6             | 2.483752                  | 3.074422  | 0.000493  |
| 5               | 6             | 3.206514                  | 1.868592  | 0.000102  |
| 6               | 7             | 2.752403                  | 0.587979  | -0.000111 |
| 7               | 6             | 3.888959                  | -0.188253 | -0.000316 |
| 8               | 6             | 3.935398                  | -1.579775 | -0.000315 |
| 9               | 6             | 2.851760                  | -2.459650 | -0.000059 |
| 10              | 7             | 1.530506                  | -2.061276 | -0.000330 |
| 11              | 6             | 0.705648                  | -3.159309 | 0.000073  |
| 12              | 6             | -0.705651                 | -3.159308 | -0.000068 |
| 13              | 7             | -1.530508                 | -2.061275 | 0.000361  |
| 14              | 6             | -2.851762                 | -2.459648 | 0.000057  |
| 15              | 6             | -3.935400                 | -1.579772 | 0.000302  |
| 16              | 6             | -3.888959                 | -0.188250 | 0.000313  |
| 17              | 7             | -2.752403                 | 0.587981  | 0.000128  |
| 18              | 6             | -3.206513                 | 1.868594  | -0.000097 |
| 19              | 6             | -2.483750                 | 3.074424  | -0.000496 |
| 20              | 6             | -0.681769                 | 4.773576  | -0.000234 |
| 21              | 6             | 0.681773                  | 4.773576  | 0.000221  |
| 22              | 6             | 4.667029                  | 1.915691  | -0.000014 |
| 23              | 6             | 5.091370                  | 0.629772  | -0.000295 |
| 24              | 6             | 2.856044                  | -3.879436 | 0.000538  |
| 25              | 6             | 1.544698                  | -4.307395 | 0.000619  |

|    |   |           |           |           |
|----|---|-----------|-----------|-----------|
| 26 | 6 | -1.544701 | -4.307394 | -0.000630 |
| 27 | 6 | -2.856047 | -3.879434 | -0.000549 |
| 28 | 6 | -5.091369 | 0.629776  | 0.000287  |
| 29 | 6 | -4.667027 | 1.915695  | 0.000020  |
| 30 | 1 | 0.000001  | 1.613850  | 0.000009  |
| 31 | 1 | 1.307360  | -1.068488 | -0.000365 |
| 32 | 1 | -1.307361 | -1.068487 | 0.000420  |
| 33 | 1 | -1.346332 | 5.626452  | -0.000494 |
| 34 | 1 | 1.346336  | 5.626451  | 0.000473  |
| 35 | 1 | 3.120529  | 3.954834  | 0.000871  |
| 36 | 1 | 5.259779  | 2.821566  | 0.000125  |
| 37 | 1 | 6.105496  | 0.251367  | -0.000480 |
| 38 | 1 | 4.918728  | -2.039632 | -0.000411 |
| 39 | 1 | 3.746916  | -4.491686 | 0.000878  |
| 40 | 1 | 1.192600  | -5.328323 | 0.001116  |
| 41 | 1 | -1.192604 | -5.328323 | -0.001137 |
| 42 | 1 | -3.746919 | -4.491683 | -0.000900 |
| 43 | 1 | -4.918729 | -2.039628 | 0.000379  |
| 44 | 1 | -6.105495 | 0.251372  | 0.000463  |
| 45 | 1 | -5.259776 | 2.821570  | -0.000117 |
| 46 | 1 | -3.120526 | 3.954837  | -0.000881 |

C. Amethyrin (9)

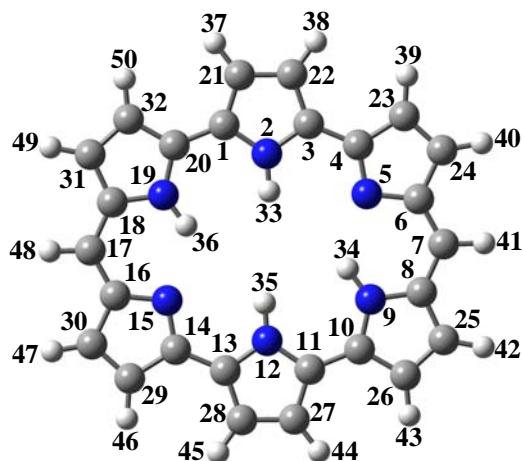

| Position<br>Number | Atomic<br>Number | Cartesian Coordinates / Å |           |           |
|--------------------|------------------|---------------------------|-----------|-----------|
|                    |                  | X                         | Y         | Z         |
| 1                  | 6                | -1.067461                 | 3.297210  | 0.000164  |
| 2                  | 7                | 0.055929                  | 2.501688  | -0.000080 |
| 3                  | 6                | 1.195219                  | 3.272858  | 0.000140  |
| 4                  | 6                | 2.509778                  | 2.681214  | -0.000035 |
| 5                  | 7                | 2.704894                  | 1.362774  | -0.000090 |
| 6                  | 6                | 4.093880                  | 1.193842  | -0.000194 |
| 7                  | 6                | 4.728775                  | -0.030307 | -0.000190 |
| 8                  | 6                | 4.111658                  | -1.301480 | -0.000146 |
| 9                  | 7                | 2.737335                  | -1.462321 | -0.000219 |
| 10                 | 6                | 2.414613                  | -2.789207 | 0.000053  |
| 11                 | 6                | 1.067459                  | -3.297157 | 0.000156  |
| 12                 | 7                | -0.055958                 | -2.501693 | 0.000045  |
| 13                 | 6                | -1.195211                 | -3.272897 | 0.000160  |
| 14                 | 6                | -2.509796                 | -2.681272 | 0.000031  |
| 15                 | 7                | -2.704877                 | -1.362828 | -0.000218 |
| 16                 | 6                | -4.093855                 | -1.193862 | -0.000216 |
| 17                 | 6                | -4.728743                 | 0.030299  | -0.000177 |
| 18                 | 6                | -4.111639                 | 1.301482  | -0.000154 |
| 19                 | 7                | -2.737324                 | 1.462382  | -0.000276 |
| 20                 | 6                | -2.414643                 | 2.789281  | 0.000038  |
| 21                 | 6                | -0.622853                 | 4.622099  | 0.000530  |
| 22                 | 6                | 0.783725                  | 4.606199  | 0.000516  |
| 23                 | 6                | 3.758099                  | 3.421917  | -0.000139 |
| 24                 | 6                | 4.748163                  | 2.484685  | -0.000227 |
| 25                 | 6                | 4.672056                  | -2.591139 | -0.000146 |
| 26                 | 6                | 3.622717                  | -3.512940 | 0.000105  |
| 27                 | 6                | 0.622904                  | -4.622070 | 0.000509  |
| 28                 | 6                | -0.783672                 | -4.606224 | 0.000382  |
| 29                 | 6                | -3.758139                 | -3.421949 | 0.000030  |
| 30                 | 6                | -4.748183                 | -2.484687 | -0.000287 |
| 31                 | 6                | -4.672082                 | 2.591122  | -0.000136 |
| 32                 | 6                | -3.622770                 | 3.512964  | 0.000130  |
| 33                 | 1                | 0.095092                  | 1.495518  | -0.000409 |
| 34                 | 1                | 2.148281                  | -0.630787 | -0.000380 |
| 35                 | 1                | -0.095145                 | -1.495522 | -0.000159 |
| 36                 | 1                | -2.148200                 | 0.630930  | -0.000478 |
| 37                 | 1                | -1.260972                 | 5.493720  | 0.000788  |
| 38                 | 1                | 1.439239                  | 5.464850  | 0.000759  |
| 39                 | 1                | 3.858934                  | 4.498645  | -0.000136 |
| 40                 | 1                | 5.818521                  | 2.646118  | -0.000310 |
| 41                 | 1                | 5.815187                  | -0.029355 | -0.000210 |
| 42                 | 1                | 5.731031                  | -2.809023 | -0.000187 |
| 43                 | 1                | 3.701020                  | -4.590142 | 0.000255  |
| 44                 | 1                | 1.261051                  | -5.493669 | 0.000744  |
| 45                 | 1                | -1.439147                 | -5.464905 | 0.000517  |

|    |   |           |           |           |
|----|---|-----------|-----------|-----------|
| 46 | 1 | -3.859008 | -4.498672 | 0.000137  |
| 47 | 1 | -5.818545 | -2.646099 | -0.000442 |
| 48 | 1 | -5.815153 | 0.029342  | -0.000162 |
| 49 | 1 | -5.731065 | 2.808968  | -0.000155 |
| 50 | 1 | -3.701124 | 4.590163  | 0.000311  |

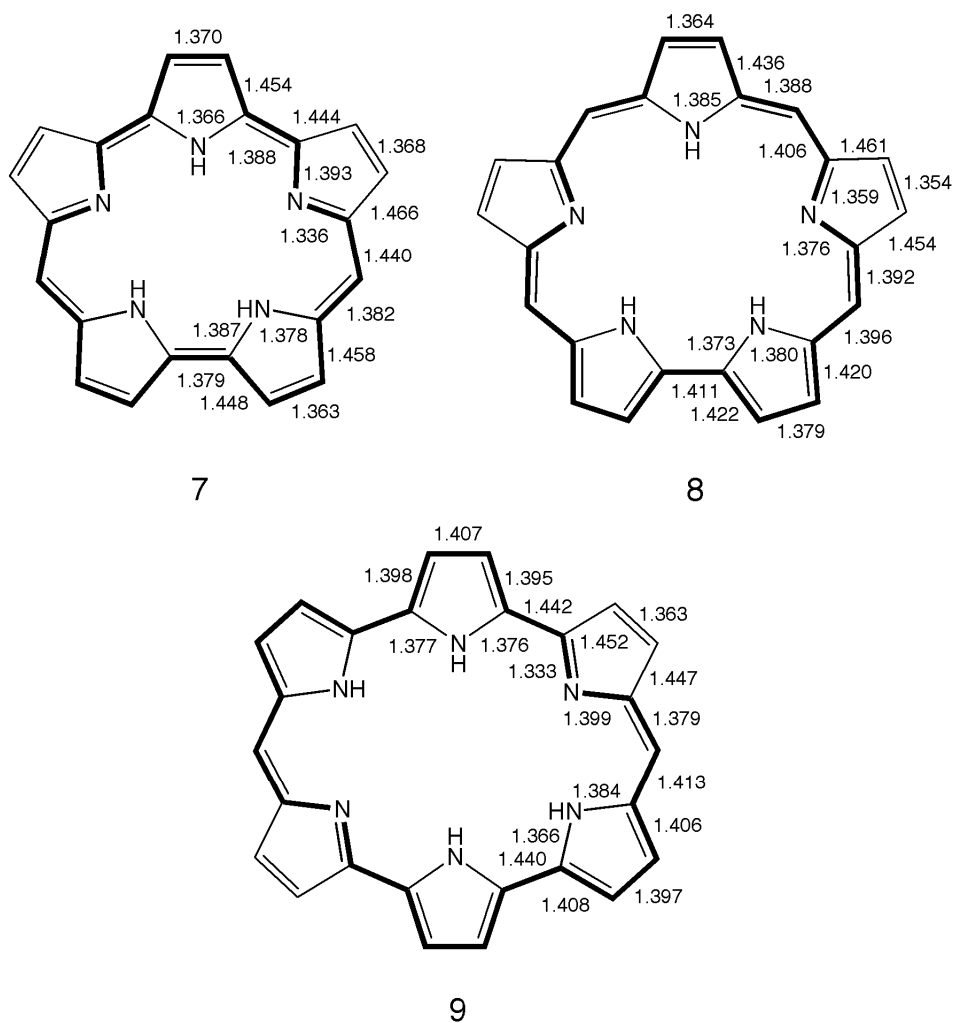

**Fig. S1** Calculated bond lengths in units of Å.
